# Supplementary material for: Molecular Characterization of the Dual Effect of the GPER Agonist G-1 in Glioblastoma
Source: MDPI journal article supplement (doi:10.3390/ijms232214309), 2022-11-18
Supplement: s1 [file s1]

**Supplementary Materials:**

To assess the IC<sub>50</sub> of G-1, GBM cells were seeded in 96-well plates in complete medium for 24h and then deprived from steroid hormones for another 24h in 10% charcoal-stripped FBS medium. Thereafter, cells were exposed for 72h to a range of 1nM to 10μM G-1 and the number of metabolically active cells was assessed by MTT assay. IC<sub>50</sub> was calculated using GraphPad Prism 8.
