# Supplementary material for: Molecular Characterization of the Dual Effect of the GPER Agonist G-1 in Glioblastoma
Source: MDPI journal article supplement (doi:10.3390/ijms232214309), 2022-11-18
Supplement: s1 [file s1]

**Supplementary Materials:** The following supporting information can be downloaded at: [www.mdpi.com/xxx/s1](http://www.mdpi.com/xxx/s1), Figure S1: G-1 impact on U87MG cells in vitro. Figure S2: Animal weight follow-up during G-1 treatment;. Figure S3: Representatives Ki-67 and H&E staining of tumors of vehicle or G-1 treated mice; Figure S4: Half-maximal inhibitory concentration (IC<sub>50</sub>) determination of G-1 in U251 and RADH87 GBM cells.; Table S1: List of significant DEGs by G-1 treatment ( $p < 0.05$ ,  $|FC| > 2$ ) in at least one condition (G-1 IC<sub>50</sub> 24h, G-1 1 $\mu$ M 24h, G-1 IC<sub>50</sub> 72h, G-1 1 $\mu$ M 72h).; Table S2: List of significant DEGs by G-1 treatment ( $p < 0.05$ ,  $|FC| > 2$ ) in at least one condition (G-1 IC<sub>50</sub> or G-1 1 $\mu$ M) at 24h.; Table S3: List of significant DEGs by G-1 treatment ( $p < 0.05$ ,  $|FC| > 2$ ) in at least one condition (G-1 IC<sub>50</sub> or G-1 1 $\mu$ M) at 72h.; Table S4: List of significant DEGs by G-1 IC<sub>50</sub> treatment ( $p < 0.05$ ,  $|FC| > 2$ ) at 24h.; Table S5: List of significant DEGs by G-1 IC<sub>50</sub> treatment ( $p < 0.05$ ,  $|FC| > 2$ ) at 72h.; Table S6: List of significant DEGs by G-1 1 $\mu$ M treatment ( $p < 0.05$ ,  $|FC| > 2$ ) at 24h.; Table S7: List of significant DEGs by G-1 1 $\mu$ M treatment ( $p < 0.05$ ,  $|FC| > 2$ ) at 72h.; Table S8: Patients 'characteristics; Table S9: Primer sequences used for RT-qPCR
