# Supplementary material for: Molecular Characterization of the Dual Effect of the GPER Agonist G-1 in Glioblastoma
Source: Int J Mol Sci. 2022 Nov 18;23(22):14309. doi: 10.3390/ijms232214309 (PMC9695951; doi:10.3390/ijms232214309)
Supplement: Supplementary file 1 [file ijms-23-14309-s001.zip]

Archive with 15 entries (15 files):
- Figure S1.png
- Figure S2.png
- Figure S3.png
- Figure S4.png
- ijms-2014588-supplementary.pdf
- Supplementary M&M.pdf
- Table_S1.xlsx
- Table_S2.xlsx
- Table_S3.xlsx
- Table_S4_revised.xlsx
- Table_S5_revised.xlsx
- Table_S6.xlsx
- Table_S7.xlsx
- Table_S8.xlsx
- Table_S9_revised.xlsx
