# Supplementary material for: Molecular Characterization of the Dual Effect of the GPER Agonist G-1 in Glioblastoma
Source: Int J Mol Sci. 2022 Nov 18;23(22):14309. doi: 10.3390/ijms232214309 (PMC9695951; doi:10.3390/ijms232214309)
Supplement: Supplementary file 1 [file ijms-23-14309-s001.zip › Table_S2.xlsx]

## Sheet: Supplementary_Table_2
GeneSymbol
AATK
ADAMTS9
ANGPTL4
ARHGAP11B
ATP13A2
ATP5MGL
AURKA
BMF
BORA
CCM2L
CCNA2
CCNB1
CDC20
CHAC1
CHST1
CHTF8
COX5A
CXCL2
DBF4B
DYTN
EDN1
EEF1A1
EGR1
ENPP7P13
ETV5
EVX1
FABP7
FADS1
FAM72B
FASN
FLNB-AS1
FOSL1
FTHL17
GALR3
GPC3
GRIN2A
H3C1
HBEGF
HES6
HIPK2
HNRNPM
IL11
INSIG1
ITM2B
JDP2
KIFC1
KRT83
LDLR
LIF
LINC00707
LINC00967
LINC01258
lnc-WDR63-1
LOC100505938
LSS
LY9
LYPD1
MAFF
MT1M
NRG1
NTM
PCID2
PGAM1
PLK1
PMP22
PPIAL4A
PRR36
PTPRD
PYY2
RBFOX3
RPL21
RPL7
RPS10P7
RPS3A
RTL3
SAPCD2
SELENOP
SERPINE1
SFTA1P
SHC4
SLC25A3P1
SLC6A9
SLC7A5
SMCR6
SNHG6
SNHG7
SNORD46
SPRY1
SREBF1
SRP9
STARD4
SUMO2
TMEM129
TPT1
TRIM11
TROAP
UBA2
VWA5B2
WNT5B
XLOC_l2_007656
