# Supplementary material for: Molecular Characterization of the Dual Effect of the GPER Agonist G-1 in Glioblastoma
Source: Int J Mol Sci. 2022 Nov 18;23(22):14309. doi: 10.3390/ijms232214309 (PMC9695951; doi:10.3390/ijms232214309)
Supplement: Supplementary file 1 [file ijms-23-14309-s001.zip › Table_S3.xlsx]

## Sheet: Supplementary_Table_S3
GeneSymbol
A2M
A4GALT
AATK
ABCA13
ABCA2
ABCA7
ABCD3
ABCE1
ABHD1
ABI3BP
ABL2
ABLIM1
ABLIM3
ACACB
ACAD10
ACADSB
ACBD4
ACCS
ACKR3
ACLY
ACOT9
ACOX2
ACP5
ACSBG1
ACSL4
ACTG1P4
ADAM12
ADAMTS10
ADAMTS13
ADAMTS4
ADAMTS7
ADAMTS7P1
ADAMTS9
ADAMTSL1
ADHFE1
ADM
AEN
AFAP1L1
AFP
AGFG1
AGO2
AGT
AIDA
AKAP12
ALDH1A3
ALDH3A2
ALDH3B1
ALDH6A1
ALG13
ALK
ALOX12-AS1
AMD1P3
AMIGO1
AMIGO2
ANGPT1
ANGPTL4
ANKFY1
ANKMY1
ANKRD1
ANKRD36
ANLN
ANO3-AS1
ANTXR2
ANTXRL
ANXA2R
ANXA3
ANXA8
AOX1
APC2
APCDD1
APCDD1L
APCDD1L-DT
ARG2
ARHGAP11B
ARHGAP27
ARHGAP4
ARHGDIB
ARHGEF10L
ARHGEF16
ARHGEF26
ARHGEF4
ARID5B
ARL6
ARNTL2
ARRDC4
ARSA
ARSD
ARSF
ASAH1
ASIC1
ASMTL
ASNSP1
ASPHD1
ASPRV1
ATAD3A
ATAD3B
ATF3
ATF6B
ATL3
ATP13A2
ATP1A4
ATP2C1
ATP5MGL
ATP6V1B1-AS1
AUNIP
AURKA
AXL
AZIN2
B9D1
BAALC
BANCR
BASP1
BCAR3
BCAS3
BCAT1
BCL2L1
BCL2L11
BCL2L13
BCL9
BDH1
BDNF
BDNF-AS
BFSP1
BIRC2
BIRC3
BMF
BMP2K
BMP6
BMS1
BNC2
BNC2-AS1
BOLA2
BOP1
BORA
BRI3
BRI3BP
BTBD16
BTG2
BVES
BYSL
BZW1
C10orf143
C11orf96
C12orf75
C12orf76
C17orf82
C19orf48
C1GALT1
C1orf109
C1orf198
C1orf226
C1QTNF6
C1R
C1S
C20orf141
C4B
C4orf46
C6orf226
CA11
CA5BP1
CABCOCO1
CACFD1
CACYBP
CALCOCO1
CALCRL
CALY
CAND2
CAPG
CAPN15
CAPN3
CAPN5
CARD6
CASC15
CASP5
CASTOR3
CAT
CAV1
CAV2
CBWD5
CCDC102B
CCDC15
CCDC160
CCDC18-AS1
CCDC86
CCL2
CCL26
CCM2L
CCN2
CCNA2
CCNB1
CCND1
CD14
CD274
CD302
CD3EAP
CDC20
CDC25A
CDC42EP2
CDCA5
CDCA7
CDCA8
CDH13
CDK12
CDK14
CDK6-AS1
CDK8
CDKN1B
CDKN2A
CDKN3
CDR2
CEACAM19
CEBPA
CEBPD
CELA1
CELSR2
CENPA
CENPL
CEP55
CEP72
CERS4
CFAP300
CFAP410
CFB
CFI
CGRRF1
CHAC1
CHAC2
CHEK1
CHI3L1
CHI3L2
CHIT1
CHST1
CHST15
CHTF8
CIRBP
CISD3
CITED1
CITED2
CLCN6
CLDN4
CLGN
CLIP3
CLK3
CLMP
CLSTN3
CLU
CMTM7
CNIH3
CNOT1
CNP
CNR1
COL12A1
COL13A1
COL14A1
COL4A1
COL4A5
COL9A2
COMMD8
COQ8A
COTL1
COX5A
CPA4
CPQ
CPT1C
CREB5
CREBRF
CRELD1
CRTC1
CRYAB
CRYBA2
CRYBB2
CRYL1
CSF1
CSF2
CSGALNACT2
CSMD2
CST5
CSTF2
CTNNA2
CTNND2
CTPS1
CTSC
CTSF
CTSH
CTSO
CXCL14
CXCL2
CXCL3
CXXC5
CYB5R2
CYBRD1
CYGB
CYP19A1
CYP27A1
CYP2U1
CYTOR
DACH1
DBT
DCAF13
DCBLD2
DCLK1
DDIAS
DDIT3
DDIT4L
DDR1
DDX10
DDX21
DDX6
DEPP1
DGLUCY
DHRS12
DHRS3
DIABLO
DICER1-AS1
DIRAS3
DKC1
DLEU2
DLL3
DLX5
DLX6
DNAJC18
DOCK5
DOCK9
DOK3
DPEP3
DUSP10
DUSP4
DUSP5
DUSP6
DYTN
E2F7
ECHDC2
EDN1
EDRF1-DT
EEF1A1
EEF1AKMT4
EEF1E1
EFEMP2
EFHD1
EFNA1
EFNB3
EHD4
EHD4-AS1
EIF4EBP1
EIF5A
EIF6
ELK3
ELMOD1
ELOA
EMC3-AS1
EMP1
ENHO
ENPP7P13
EPB41L4A
EPHA2
EPHA4
ERCC6L
ERO1A
ERVK3-1
ETS2
ETV5
EVI2A
EVI2B
EVX1
EXD3
EXOSC2
EXOSC5
F12
F2R
FAIM2
FAM107B
FAM120C
FAM122C
FAM20C
FAM216A
FAM228B
FAM229A
FAM72B
FAM72D
FAM86B3P
FAM89A
FAM91A1
FANCA
FAP
FARSB
FAXDC2
FBLL1
FBLN1
FBXL20
FBXO25
FBXO32
FBXO36
FBXW4
FCGR2C
FCGRT
FEZF1-AS1
FGD5-AS1
FIGN
FJX1
FKBP4
FLNB-AS1
FLOT1
FLVCR1
FOSL1
FOSL2
FOXD3-AS1
FOXK2
FOXL1
FOXN3-AS1
FOXO1
FRMD6
FRY
FRZB
FST
FTHL17
FZD4
GAA
GABPB1
GABRE
GACAT2
GADD45A
GALNT12
GALNT17
GALR3
GANC
GARS1
GART
GAS1
GAS5
GASAL1
GASK1B
GATA3
GATAD2A
GATM
GBP2
GDF15
GFAP
GFOD1
GGTLC1
GGTLC3
GJA1
GJA3
GLB1L
GLDN
GLIS1
GLIS3
GLTPD2
GLUD1P2
GLYATL2
GNAZ
GNG7
GNL3
GNS
GOLIM4
GPAT3
GPATCH4
GPC3
GPM6B
GPNMB
GPR107
GPR137B
GPRC5B
GRAMD1A
GRIN2A
GRK3
GRPR
GSAP
GSN
GSPT1
GSTA4
H2BC12
H3C1
H4C8
HAS2-AS1
HASPIN
HAUS6
HBEGF
HCN2
HDAC5
HDHD5-AS1
HEPH
HEXD
HIPK2
HKDC1
HLA-C
HMGA1
HMGA2
HMOX1
HNRNPH3
HNRNPM
HOMER2
HOMER3
HOPX
HOXB9
HOXD3
HRK
HROB
HS6ST1
HSD17B14
HSPG2
HTR7
ICOSLG
ID2
ID4
IDH1-AS1
IDO1
IDUA
IER3
IER5L
IFI44L
IFIT2
IFITM2
IFITM4P
IFRD1
IFRD2
IFT140
IGFBP3
IGFBP5
IGFBP7
IKBIP
IL11
IL17RC
IL18
IL20RB
IL32
IL4R
IL7R
IMP4
INF2
ING1
INHBA
INIP
INPP5A
INPP5F
INSIG2
INTS6-AS1
IQCK
IRF1
ISCA1
ITGA11
ITGA9
ITGB3
ITGB4
ITM2B
JAG1
JDP2
JMJD6
JMY
JPH2
JPH3
KALRN
KANK1
KBTBD13
KCNE5
KCNIP4
KCNJ2
KCNMB1
KCNN4
KCNQ5-IT1
KCP
KCTD12
KDM7A
KDM7A-DT
KDR
KDSR
KHDRBS3
KIAA0408
KIAA0513
KIF16B
KIF18A
KIF23
KIF6
KIFAP3
KIZ
KLF10
KLF3
KLF6
KLF7
KLHDC9
KLHL22
KLHL24
KLHL3
KLRG2
KMT5A
KMT5B
KRT32
KRT80
KRT81
KRT83
KRT8P12
KRTAP1-1
KRTAP1-4
KRTAP4-11
LAMB2
LAMC2
LAMP2
LARGE1
LBX1
LCP1
LDLRAD4
LHPP
LHX1
LHX1-DT
LIF
LIMA1
LINC00271
LINC00312
LINC00461
LINC00475
LINC00520
LINC00632
LINC00662
LINC00674
LINC00707
LINC00847
LINC00853
LINC00930
LINC00941
LINC00967
LINC01023
LINC01144
LINC01258
LINC01291
LINC01444
LINC01535
LINC01711
LINC02035
LINC02085
LINC02104
LINC02154
LINC02593
LINC02595
LINC02693
LINP1
LLGL2
LMBR1
LMCD1
LMNTD2-AS1
LMO3
LMO7
lnc-CCDC68-1
lnc-CYP7B1-3
lnc-HDAC2-1
lnc-MYC-2
lnc-NAA35-1
lnc-PKNOX1-2
lnc-PPP2R2D-3
lnc-RP11-158I9.5.1-2
lnc-RP11-597K23.2.1-2
lnc-RTL1-2
lnc-SH3BP4-3
lnc-THNSL1-2
lnc-VWF-2
lnc-WDR63-1
LOC100505938
LOC100507291
LOC100507516
LOC101927100
LOC101927318
LOC101928370
LOC101928402
LOC105372631
LOC105373656
LOC105374347
LOC105377123
LOC107984208
LOC107987300
LOC153684
LOC254896
LOC401127
LOC646652
LOC728392
LOX
LOXL4
LPCAT2
LPIN1
LPL
LPXN
LRP1B
LRRC2
LRRC24
LRRC56
LRRC73
LRRC8B
LRRFIP1
LRRFIP2
LSAMP
LSMEM1
LTBP3
LYAR
LYNX1
LYPD1
LYPLAL1
LYRM9
LZTS1
MAD2L1
MAFF
MAL
MAN1A1
MAN1C1
MANCR
MAP2K3
MAP6
MAPKAP1
MAPT
MARCHF3
MB21D2
MBOAT1
MBOAT7
ME2
MEF2C
MEG3
MEGF8
MELTF-AS1
METRN
METTL1
METTL7A
MGLL
MICB
MIEF1
MINAR1
MINDY1
MIR3681HG
MIR4435-2HG
MIR99AHG
MLC1
MLKL
MMP1
MMP25-AS1
MMP3
MMS22L
MON1B
MOSMO
MOSPD1
MPDZ
MPP3
MPP4
MRAP2
MROH1
MRPL19
MSANTD3
MSL3
MSMO1
MSMP
MST1
MT1F
MT1M
MTFP1
MTHFD1L
MTHFD2
MTMR10
MTRNR2L2
MTRNR2L7
MTURN
MXD4
MYBL1
MYC
MYLK
MYLK2
MYO19
NAA50
NAGLU
NALCN
NANS
NAT8L
NAV3
NBR2
NCAPH2
NDC1
NDUFC2
NDUFV3
NECTIN3
NEDD4
NEDD9
NEURL1B
NEURL3
NEXN
NFASC
NFATC1
NFKBIB
NIBAN1
NKAIN3
NKAIN3-IT1
NKX3-1
NLE1
NMNAT2
NMNAT3
NOP16
NOP2
NOP56
NOVA2
NOXA1
NPHP4
NPM3
NPY1R
NR1D1
NR2F1
NRAS
NREP
NRG1
NRP1
NRP2
NT5C3A
NT5E
NTM
NTNG1
NTNG2
NUCB1
NUDT15
NUDT4
NUF2
NUP50
NUP58
ODF3B
ODF3L2
OLFML2A
OLFML2B
OPLAH
OR7E14P
ORC1
ORC6
OSBPL3
OTUD7A
OXSR1
PAM16
PAPPA
PARP14
PARP8
PARP9
PBX1
PBXIP1
PC
PCBP1-AS1
PCCA-DT
PCDH1
PCDH20
PCDHB16
PCDHB9
PCMT1
PCMTD2
PDCD6IP
PDE4DIP
PDE5A
PDGFRA
PDIA5
PDK2
PDLIM3
PDLIM5
PDSS1
PGAM1
PGAM5
PGF
PGGHG
PGM2L1
PGM5P3-AS1
PHF21A
PHLDA2
PI15
PIANP
PIEZO1
PIGZ
PIK3CD-AS2
PINLYP
PIPOX
PLA2G6
PLAAT4
PLAC9P1
PLAUR
PLCD3
PLCD4
PLEKHA7
PLEKHB1
PLEKHG4
PLEKHO1
PLK1
PLK2
PLK4
PLPP1
PLPP4
PLPP7
PLS1
PLSCR4
PLXNA2
PLXNB1
PLXNB3
PMAIP1
PMM2
PNLIPRP3
PNO1
PNP
PNPLA7
PNRC1
POLQ
POLR1E
POLR2D
POLR3G
PPA1
PPA2
PPAN
PPAT
PPDPF
PPIAL4A
PPM1M
PPP1CB
PPP1R14B-AS1
PPP1R16B
PPP4R2
PPRC1
PRDM16
PRDM8
PRKAG2
PRKAR1B
PRKCQ-AS1
PRKD1
PROS1
PRPF3
PRPS1
PRR36
PRRT2
PRRT3
PRRT3-AS1
PRSS35
PRUNE2
PSAT1
PSD4
PSG4
PSMC3IP
PSMG3-AS1
PTBP3
PTCRA
PTGFR
PTHLH
PTK2B
PTP4A1
PTPRB
PTPRD
PTPRK
PTPRS
PTPRZ1
PTX3
PUS1
PVR
PVT1
PXMP4
PYCR1
PYGO1
PYROXD2
PYY2
RAB11FIP4
RAB26
RAB27B
RAB3B
RAB7B
RAB9B
RABGGTB
RAC2
RAD51
RAD51AP1
RALGPS1
RAMP1
RAN
RAP1GDS1
RAP2C
RASA1
RASA4
RASAL2
RASGRP1
RBFOX3
RBM28
RBM43
RBPMS-AS1
RCAN2
RCL1
RDH10
RECQL5
REEP4
RFC3
RFWD3
RGL1
RGMB
RGS16
RGS4
RGS7
RHBDL1
RHOQ
RHOU
RHPN1
RIMKLA
RIOK1
RIPK2
RNASEL
RND2
RND3
RNF112
RNF141
RNF150
RNF165
RNF182
RNF2
RNF217
ROPN1
RORA
RP9P
RPF2
RPL21
RPL32
RPL7
RPRM
RPS10P7
RPS29
RPS6KA3
RRN3
RRP9
RRS1
RTL3
RTP4
RUNX1
S100A2
S100A3
S100B
S1PR1
S1PR3
SALL2
SAMD5
SAPCD2
SATB1
SCG5
SCN4B
SCRG1
SDC3
SEC14L1P1
SEC31B
SEH1L
SELENBP1
SELENOP
SEMA3B
SEMA5A
SEMA5B
SEMA6C
SEMA7A
SEPTIN4
SEPTIN9
SERINC5
SERPINA3
SERPINB7
SERPINE1
SESN2
SESN3
SETD3
SETMAR
SFRP1
SFTA1P
SGO1
SH2B3
SH3RF1
SH3YL1
SHC2
SHC4
SHCBP1
SHISA5
SIAE
SIDT2
SIK1B
SIRPA
SKA1
SLAIN1
SLC16A4
SLC16A9
SLC1A5
SLC22A17
SLC25A18
SLC25A19
SLC25A3P1
SLC27A1
SLC27A6
SLC2A10
SLC35E2A
SLC35E2B
SLC35F1
SLC35F2
SLC35F5
SLC37A2
SLC38A1
SLC38A3
SLC39A11
SLC39A8
SLC3A2
SLC40A1
SLC43A3
SLC6A6
SLC6A9
SLC7A1
SLC7A5
SLC8A1
SLCO4A1
SMAD7
SMARCA2
SMARCD3
SMG5
SMIM10L2A
SMIM10L2B
SMIM27
SMIM35
SMNDC1
SMOX
SNAP47
SNHG1
SNHG15
SNHG17
SNHG18
SNHG29
SNHG5
SNHG6
SNHG7
SNORA18
SNORA24
SNORA33
SNORA40B
SNORA44
SNORA48
SNORA57
SNORA5A
SNORA5B
SNORA6
SNORA62
SNORA63
SNORA65
SNORA67
SNORA80A
SNORA80B
SNORA84
SNORA9
SNORD11
SNORD27
SNORD38B
SNORD43
SNORD46
SNORD71
SNORD76
SNORD80
SNORD86
SNORD95
SNRNP40
SNRNP48
SNRPB
SNX1
SNX25
SOBP
SORL1
SOX2-OT
SOX4
SOX9-AS1
SP9
SPAAR
SPACA6
SPANXA1
SPANXB1
SPARC
SPDL1
SPHK1
SPINDOC
SPINK1
SPOCD1
SPON2
SPRED2
SPRY1
SPRY2
SPRY4
SPRY4-IT1
SPSB2
SRP9
SRSF11
SSH1
SSH2
SSPN
SSTR5-AS1
ST3GAL6-AS1
ST6GALNAC2
ST7-AS1
STAMBPL1
STARD9
STAT2
STC1
STEAP1
STEAP1B
STING1
STON1
STOX2
STPG1
STRA6
STRIP2
STX1A
SULF1
SULF2
SUMO2
SUV39H2
SYNE2
SYNM
SYNPO
SYT11
SYT12
SYTL2
TAF1D
TBC1D3P5
TBCD
TBRG1
TBX2-AS1
TBX3
TCEAL5
TCEANC
TCF7L1
TCN2
TCOF1
TEDC1
TENT5C
TEX30
TFEB
TGM2
THBS2
THBS3
THNSL2
THRA
THSD1
TICRR
TLE1
TLR4
TM4SF1
TM4SF19
TM7SF2
TMBIM4
TMEM120B
TMEM129
TMEM140
TMEM158
TMEM161B-AS1
TMEM171
TMEM200C
TMEM229B
TMEM244
TMEM26
TMEM47
TMEM59L
TMEM63C
TMEM79
TMEM87B
TMEM8B
TMPO
TMPRSS5
TMTC4
TNC
TNFAIP3
TNFRSF12A
TNFRSF14
TNFSF4
TNRC18
TNRC18P1
TNS2
TOMM40
TOR4A
TOX
TPD52L1
TPM3
TPP1
TPT1
TPX2
TRAF3IP2-AS1
TRAPPC10
TRAPPC6A
TRIB2
TRIB3
TRIM11
TRIM45
TRIM7
TRIP13
TRMT6
TRPC6
TRPM3
TSPAN13
TSPAN5
TTC30B
TTC39A
TTK
TTLL1
TTYH1
TUBB2B
TUFT1
TUSC1
TUSC8
TWIST2
TWNK
TXNDC15
TXNIP
UAP1
UBA7
UBE2E3
UCK2
UCN2
UCP3
UGCG
UHRF2
ULK2
UNK
UPP1
USB1
USP31
USP53
UTP4
UTS2R
VAPA
VBP1
VDAC1
VDR
VEGFC
VEPH1
VGF
VIT
VLDLR
VLDLR-AS1
VMAC
VPS35L
VSNL1
VSTM2L
VSX1
WBP1L
WDR19
WDR4
WDR63
WDR74
WNT5B
WWTR1
XDH
XKR4
XLOC_l2_007656
XPOT
XRCC3
YARS1
YPEL3
YRDC
ZBED5-AS1
ZBTB20
ZBTB24
ZC3H6
ZFAND2A
ZIK1
ZNF365
ZNF436
ZNF436-AS1
ZNF44
ZNF467
ZNF497
ZNF503
ZNF503-AS2
ZNF577
ZNF598
ZNF618
ZNF655
ZNF697
ZNF710-AS1
ZNF837
ZNF862
ZPR1
ZWILCH
ZWINT
