# Supplementary material for: Molecular Characterization of the Dual Effect of the GPER Agonist G-1 in Glioblastoma
Source: Int J Mol Sci. 2022 Nov 18;23(22):14309. doi: 10.3390/ijms232214309 (PMC9695951; doi:10.3390/ijms232214309)
Supplement: Supplementary file 1 [file ijms-23-14309-s001.zip › Table_S4_revised.xlsx]

## Sheet: Supplementary_Table_S4_revised
GeneSymbol	pvalue	FC	Régulation	GO terms		Functions
FASN	0.00282733	2.23037	up	GO:0019218	GO:0019216	Regulation of steroid and lipid metabolisms
LY9	0.00274732	2.52886				Another function
MVD	0.0348407	2.05625		GO:0019218	GO:0019216	Regulation of steroid and lipid metabolisms
SLC7A5	0.000866286	2.05239				Another function
SREBF1	2.4581e-05	2.0268		GO:0019218	GO:0019216	Regulation of steroid and lipid metabolisms
STARD4	0.00201211	2.04787		GO:0019218	GO:0019216	Regulation of steroid and lipid metabolisms
