# Supplementary material for: Molecular Characterization of the Dual Effect of the GPER Agonist G-1 in Glioblastoma
Source: Int J Mol Sci. 2022 Nov 18;23(22):14309. doi: 10.3390/ijms232214309 (PMC9695951; doi:10.3390/ijms232214309)
Supplement: Supplementary file 1 [file ijms-23-14309-s001.zip › Table_S5_revised.xlsx]

## Sheet: Supplementary_Table_S5_revised
GeneSymbol	pvalue	FC	Regulation	GO terms	Functions
ACSBG1	0.000914639	2.75749	up	GO:0001676	Long-chain fatty acid metabolic process
ANGPTL4	3.67311e-05	67.3096		GO:0006629	Lipid metabolic process
MGLL	0.000758824	2.01658		GO:0006629	Lipid metabolic process
RGS16	0.000267801	2.62493			Another function
CELA1	0.000400467	-2.35296	down		Another function
DHRS3	9.06889e-06	-4.48509			Another function
ITGB3	6.71122e-05	-3.30569			Another function
