# Supplementary material for: Molecular Characterization of the Dual Effect of the GPER Agonist G-1 in Glioblastoma
Source: Int J Mol Sci. 2022 Nov 18;23(22):14309. doi: 10.3390/ijms232214309 (PMC9695951; doi:10.3390/ijms232214309)
Supplement: Supplementary file 1 [file ijms-23-14309-s001.zip › Table_S6.xlsx]

## Sheet: Supplementary_Table_S6
GeneSymbol	pvalue	FC
AATK	0.00308084	-2.11886
ADAMTS9	0.00147108	2.03463
ANGPTL4	0.000120596	37.7406
ARHGAP11B	0.000706666	2.192
ATP13A2	3.4441e-05	2.00099
ATP5MGL	0.00815107	-2.23445
AURKA	0.000242457	2.26133
BMF	0.000382571	-2.38586
BORA	0.00159016	2.01361
CCM2L	5.45382e-05	-2.88733
CDC20	0.000641916	2.13786
CHAC1	0.000974624	2.32704
CHST1	0.00182555	-2.77339
CHTF8	0.00349172	-2.04259
COX5A	0.00196414	-2.18657
CXCL2	0.000292372	2.08366
DDX6	0.0131538	-2.19465
DYTN	0.000807294	-2.53205
EDN1	0.00213331	2.31095
EGR1	0.000355981	2.58805
ENPP7P13	0.000579185	-2.144
ETV5	3.77912e-05	2.24263
EVX1	0.00043843	-2.57942
FABP7	0.0095534	2.06748
FADS1	0.000995871	2.0805
FASN	0.00209135	2.61504
FLNB-AS1	0.00171949	-3.21117
FOSL1	0.000296274	2.50494
FTHL17	0.00080322	-2.46289
GPC3	0.000504807	-2.50825
GRIN2A	0.000617305	-2.91426
H3C1	8.24666e-05	-2.18998
HBEGF	0.0050305	2.14054
HES6	0.00437512	2.70148
HIPK2	0.00271698	-2.32393
HNRNPM	0.00619811	-2.01095
IL11	0.00072117	2.13825
INSIG1	0.00170311	2.12728
ITM2B	0.000560089	-3.72545
KRT83	0.000242618	2.12895
LDLR	2.52429e-05	2.07605
LIF	0.002836	3.99824
LINC00707	0.000262508	2.26987
LINC00967	0.000129083	-2.58454
LINC01258	0.00198683	-2.10694
lnc-WDR63-1	4.63996e-05	-2.10752
LSS	0.00989231	2.19513
MAFF	0.000187911	2.16
MOCS3	0.00753354	-2.06528
MT1M	0.000741768	-2.32789
NRG1	0.00129767	2.09542
NTM	6.80534e-05	2.08583
PLK1	0.000801916	2.13128
PMP22	0.00348059	2.52142
PPIAL4A	0.00762628	-2.38559
PRR36	0.000338313	-2.17151
PRRT3-AS1	0.00146728	-2.45659
PTPRD	0.000344534	-2.16851
PYY2	0.000225855	-2.57433
RBFOX3	0.00319011	-2.36221
RPL7	0.000498597	-2.33055
RTL3	0.00418017	2.08928
SAPCD2	0.000622545	2.00685
SELENOP	0.000330711	-2.13832
SERPINE1	0.000200346	2.08133
SLC25A3P1	0.00217711	-2.11094
SLC6A9	8.0895e-06	2.13594
SLC7A5	4.16792e-05	2.5898
SMCR6	0.000349272	2.63109
SNHG6	0.00558806	-2.13833
SNHG7	5.05668e-05	2.07734
SNORD46	0.000354458	4.93445
SPRY1	2.25888e-05	2.83743
STARD4	0.00190469	2.14044
SUMO2	0.000981767	-2.48184
TPT1	0.00640836	-2.35991
TRIM11	0.000153816	2.41036
TROAP	7.78427e-05	2.41663
VWA5B2	2.05306e-06	2.05646
WNT5B	2.47097e-05	2.17051
XLOC_l2_007656	9.23032e-06	-3.59322
