# Supplementary material for: Molecular Characterization of the Dual Effect of the GPER Agonist G-1 in Glioblastoma
Source: Int J Mol Sci. 2022 Nov 18;23(22):14309. doi: 10.3390/ijms232214309 (PMC9695951; doi:10.3390/ijms232214309)
Supplement: Supplementary file 1 [file ijms-23-14309-s001.zip › Table_S7.xlsx]

## Sheet: Supplementary_Table_S7
GeneSymbol	pvalue	FC
A2M	5.44417e-05	-7.18791
A4GALT	0.000896353	2.04075
AATK	2.96415e-05	-2.44888
ABCA13	0.000168684	-3.3098
ABCA2	0.00315513	-2.05411
ABCA7	2.18179e-05	-2.21858
ABCD3	6.28833e-07	2.29418
ABCE1	2.60665e-06	2.12416
ABHD1	0.000530377	-2.08699
ABI3BP	0.000545318	-3.4995
ABLIM1	3.63433e-08	-2.95401
ACACB	0.000414645	-2.27971
ACAD10	5.20232e-05	-2.72725
ACADSB	7.89727e-05	-2.00777
ACBD4	0.000878654	-2.27825
ACCS	0.000178189	-2.03094
ACKR3	0.000113403	-5.18211
ACLY	8.04755e-06	2.08317
ACOT9	1.98222e-06	2.21632
ACOX2	4.40295e-07	4.31915
ACP5	0.00011184	-2.8666
ACSL4	1.91864e-05	2.23153
ACTG1P4	0.000671271	-2.00099
ADAM12	8.01851e-05	-2.00633
ADAMTS10	8.0755e-05	-2.90967
ADAMTS13	2.93818e-05	-3.84098
ADAMTS4	1.74402e-05	2.10985
ADAMTS7	6.54582e-06	-3.09443
ADAMTS7P1	1.17675e-05	-4.34687
ADAMTS9	8.65094e-05	2.92766
ADAMTSL1	3.56694e-05	-2.12466
ADHFE1	5.63639e-05	-3.03529
ADM	0.000215986	2.48736
AEN	3.63425e-06	3.5923
AFAP1L1	6.70892e-06	2.19419
AGFG1	7.4867e-06	2.23542
AGO2	7.70066e-06	2.23848
AGT	6.78793e-07	-4.13204
AIDA	1.62973e-05	2.50514
AKAP12	6.29995e-07	-2.94285
ALDH1A3	4.66266e-05	2.27175
ALDH3A2	3.06684e-05	-2.53521
ALDH3B1	0.00332608	-2.09251
ALDH6A1	4.03002e-06	-2.47177
ALG13	9.75352e-05	2.26268
ALK	2.42562e-05	-6.16632
ALOX12-AS1	5.87795e-06	-3.48204
AMD1P3	1.94528e-05	2.48888
AMIGO1	7.84331e-05	-2.03869
AMIGO2	8.08298e-08	3.89514
ANGPT1	0.000688626	-2.26681
ANGPTL4	2.27179e-06	231.639
ANKFY1	0.000224847	2.21702
ANKMY1	1.32683e-06	-2.26439
ANKRD1	0.00059258	3.23584
ANKRD36	0.000397648	2.20651
ANLN	0.00132084	2.3081
ANO3-AS1	0.00733491	-2.48901
ANTXR2	8.60167e-05	2.67663
ANTXRL	6.31908e-05	-4.42106
ANXA2R	1.09004e-06	-4.36525
ANXA3	4.10499e-06	2.43281
AOX1	2.92014e-06	5.07033
APC2	0.000324369	-2.13836
APCDD1	7.07234e-06	-4.82152
APCDD1L	7.19866e-05	2.59307
APCDD1L-DT	4.81687e-06	3.24215
ARHGAP11B	3.78696e-06	2.32332
ARHGAP27	4.60011e-05	4.74503
ARHGAP4	0.000347083	-2.21081
ARHGEF10L	3.20619e-06	-2.51348
ARHGEF16	3.3602e-05	2.56052
ARHGEF26	1.76089e-05	2.03038
ARHGEF4	1.09226e-07	-3.58497
ARID5B	3.27707e-05	-2.20762
ARL6	2.72114e-05	2.23011
ARNTL2	1.01806e-05	2.22181
ARRDC4	1.44437e-05	-2.79924
ARSA	1.81222e-05	-2.26948
ARSD	7.91368e-05	-2.09121
ARSF	6.05757e-06	-4.24893
ASAH1	4.75774e-05	-2.09366
ASIC1	0.000795052	-2.00584
ASMTL	2.64598e-06	-2.03681
ASNSP1	2.58424e-05	2.37473
ASPHD1	0.000453861	2.22771
ASPRV1	2.46029e-05	-2.62012
ATAD3B	2.90099e-05	2.12547
ATL3	9.66362e-06	2.56156
ATP13A2	0.000195166	2.05324
ATP1A4	0.00988104	-2.21809
ATP2C1	0.000109701	2.19054
ATP5MGL	0.0176505	-2.37729
AUNIP	9.21202e-05	2.10031
AURKA	8.55377e-07	3.03194
AXL	1.89472e-06	2.16177
AZIN2	0.000222197	-2.01888
B9D1	2.46038e-06	-2.19371
BAALC	1.70246e-05	-3.66704
BASP1	0.000181341	2.26992
BCAR3	1.09168e-05	2.95516
BCAS3	5.71654e-05	-2.29649
BCAT1	0.00029002	2.2987
BCL2L1	0.00114236	2.00147
BCL9	4.26363e-05	-2.00406
BDH1	2.94574e-05	-2.51969
BDNF	5.1804e-05	4.80267
BDNF-AS	3.60505e-06	-4.97221
BFSP1	0.000425938	-2.1861
BIRC2	3.48321e-06	2.11213
BIRC3	0.00157434	2.71056
BMF	2.50413e-07	-5.34287
BMP2K	0.000640983	2.21072
BMP6	1.61216e-05	2.24226
BMS1	2.99848e-06	2.05321
BNC2-AS1	2.92213e-05	-2.31428
BORA	1.1459e-06	2.46075
BRI3	5.54825e-07	2.66298
BRI3BP	8.41404e-06	2.00608
BTBD16	5.64114e-06	-3.25638
BTG2	2.94182e-07	-5.19108
BVES	0.000703604	-2.21354
BYSL	7.55515e-06	2.05367
BZW1	1.38087e-05	2.41658
C10orf143	4.09843e-05	-2.55372
C11orf96	1.25185e-06	6.05289
C12orf75	0.000236187	2.00815
C12orf76	0.000137829	-2.30815
C17orf82	6.52413e-06	-2.63284
C1GALT1	5.54123e-06	2.37971
C1orf109	0.00179344	2.13882
C1orf198	1.70755e-05	-2.28712
C1orf226	6.86558e-05	-2.45323
C1QTNF6	2.26954e-06	-2.79259
C1R	1.35389e-05	-3.69253
C1S	4.64558e-06	-3.46607
C20orf141	5.02069e-05	-6.99521
C4B	0.000148146	-2.54241
C4orf46	0.000114661	2.03199
C6orf226	8.82639e-06	-2.24908
CA11	2.4902e-05	-2.62399
CA5BP1	8.89223e-06	2.12792
CACFD1	1.69808e-06	-2.5319
CACYBP	5.40065e-06	2.19824
CALCOCO1	4.62534e-05	-2.50309
CALY	0.00462365	-2.27363
CAND2	8.56461e-05	-2.53894
CAPG	2.62826e-05	2.4815
CAPN15	2.03405e-07	4.26733
CAPN3	1.59368e-05	-4.67241
CAPN5	4.20167e-06	-2.72994
CARD6	0.000388797	-2.33276
CASC15	0.000397241	-2.05409
CASTOR3	6.31348e-07	-2.86052
CAV1	2.28264e-06	2.8458
CAV2	2.47741e-05	2.31914
CBWD5	5.94496e-05	2.09981
CCDC102B	3.12993e-05	-2.01533
CCDC15	0.00208493	2.30301
CCDC160	7.80631e-06	-4.96137
CCDC18-AS1	3.10993e-06	-2.26979
CCM2L	0.00828337	-4.37527
CCN2	1.31693e-05	3.06389
CCNA2	7.35293e-06	2.42277
CCNB1	2.26324e-05	2.14424
CCND1	8.45912e-05	3.29817
CD274	3.46341e-06	5.09138
CD302	9.58215e-05	-2.01453
CD3EAP	3.26403e-05	2.98806
CDC20	1.02977e-06	2.58503
CDC25A	4.89512e-05	2.34552
CDC42EP2	1.31834e-05	2.15221
CDCA7	5.72903e-05	2.6101
CDCA8	1.13672e-05	2.06505
CDH13	1.73995e-06	2.31366
CDK14	1.72079e-06	2.11378
CDK6-AS1	1.9262e-06	3.57387
CDK8	0.0064492	2.27646
CDKN1B	0.000137696	-2.0628
CDKN2A	0.00233273	-2.26559
CDKN3	1.51601e-06	2.42171
CDR2	9.07825e-06	2.32531
CEBPA	3.53321e-07	-3.302
CEBPD	7.88124e-06	-2.38133
CELA1	3.77759e-07	-14.6171
CELSR2	0.000472069	-2.25674
CENPA	0.000248515	2.18053
CENPL	0.000150643	2.15098
CEP55	0.000148319	2.72407
CERS4	1.00951e-05	-2.46808
CFAP300	1.47047e-05	-3.27506
CFAP410	0.000131421	-2.03467
CFB	1.01746e-05	-2.88693
CFI	3.66727e-05	-3.64257
CGRRF1	1.1701e-05	2.1996
CHAC1	1.82686e-05	3.25163
CHAC2	0.00054927	2.47997
CHEK1	9.05915e-07	2.69528
CHI3L1	1.15924e-05	-4.09539
CHI3L2	8.93752e-07	-6.46531
CHST1	0.000117971	-4.61748
CIRBP	1.14845e-05	-2.66904
CISD3	0.0025279	-2.04058
CITED1	0.00371146	-2.82625
CLCN6	2.38624e-07	2.31488
CLDN4	1.15782e-06	2.79964
CLGN	5.56588e-05	2.07135
CLIP3	2.96437e-06	-2.70635
CLMP	0.000140124	2.30023
CLSTN3	0.000296493	-2.39369
CLU	0.00010504	-3.00016
CMTM7	4.61573e-06	2.13872
CNIH3	3.75543e-06	-5.28733
CNOT1	7.66987e-06	2.07898
CNP	2.7108e-05	-2.05666
CNR1	1.91976e-05	-4.90076
COL12A1	8.48865e-06	-2.2689
COL13A1	9.55505e-06	3.80939
COL14A1	0.000130215	-2.8819
COL4A1	0.000214119	2.00411
COL4A5	3.19717e-05	-2.07786
COL9A2	0.000136664	-2.03079
COMMD8	0.00363365	2.00067
COTL1	0.000557441	2.15443
COX5A	0.00749427	-2.17386
CPA4	7.30867e-05	2.84968
CPQ	0.000111355	-2.01816
CPT1C	9.90836e-05	-2.1403
CREBRF	1.46428e-05	-2.35306
CRELD1	3.13447e-06	-2.30084
CRTC1	1.68903e-06	-2.82865
CRYAB	0.00587657	-2.10772
CRYBA2	6.55056e-05	2.0631
CRYBB2	7.47227e-06	2.02489
CSF1	1.49426e-06	-2.15511
CSF2	1.24211e-05	23.5894
CSGALNACT2	3.19075e-07	2.2767
CSMD2	3.79258e-06	2.01721
CTNNA2	0.000377568	-2.61226
CTNND2	5.61721e-05	-3.03857
CTPS1	1.37255e-05	2.18072
CTSC	7.90682e-08	4.27858
CTSF	1.84829e-05	-2.80616
CTSH	2.88754e-06	-2.49175
CTSO	3.83429e-05	-2.8337
CXCL14	0.00208784	-2.30423
CXCL2	1.49204e-09	10.2158
CXCL3	2.208e-08	9.04349
CXXC5	4.06586e-05	-2.52802
CYB5R2	1.54945e-06	3.22763
CYGB	6.50786e-05	-2.37271
CYP19A1	2.86856e-05	-8.75264
CYP27A1	2.2732e-06	-2.3251
CYP2U1	0.000166699	-2.20414
CYTOR	0.000688345	2.86598
DACH1	8.04747e-05	-2.45716
DBT	7.47341e-05	-2.22228
DCAF13	2.09997e-05	2.08149
DCBLD2	1.00397e-06	2.41534
DCLK1	5.12876e-05	-2.70775
DDIAS	2.15993e-06	3.37587
DDIT3	3.69001e-06	2.35145
DDIT4L	9.36653e-06	-2.79527
DDR1	6.80718e-06	-2.03812
DDX10	7.92746e-06	2.03959
DDX21	1.55737e-06	2.54756
DGLUCY	2.00356e-05	2.89025
DHRS12	4.29902e-06	-2.39607
DHRS3	6.7557e-06	-6.45893
DIABLO	0.00867483	-2.03131
DICER1-AS1	0.000534826	-2.2986
DIRAS3	0.000171055	2.99273
DKC1	9.37863e-05	2.56209
DLEU2	0.000181579	2.68704
DLL3	0.000110797	2.19948
DLX5	8.07232e-06	-2.04063
DNAJC18	6.91084e-05	-2.2048
DOCK5	1.36362e-05	2.54617
DOK3	3.05702e-06	3.58742
DUSP10	2.75983e-06	2.9656
DUSP4	1.40955e-05	3.78916
DUSP5	1.60773e-05	4.64942
DUSP6	1.10972e-07	3.36431
DYTN	0.00109671	-2.51851
E2F7	4.26321e-07	2.77089
ECHDC2	8.15852e-06	-2.02302
EDN1	2.61723e-05	4.62548
EDRF1-DT	7.73028e-07	-3.1465
EEF1A1	0.000144072	-2.23521
EEF1AKMT4	1.21117e-05	2.00539
EEF1E1	4.03181e-06	2.28767
EFEMP2	6.26251e-06	-2.20881
EFHD1	7.90549e-09	-13.6498
EFNB3	8.75127e-05	-2.35118
EHD4	6.7344e-05	2.053
EHD4-AS1	2.06293e-05	-2.7818
EIF4EBP1	4.21167e-06	3.09768
ELK3	1.79205e-06	2.58324
ELMOD1	3.21789e-06	-7.14766
ELOA	6.0188e-05	2.05402
EMC3-AS1	0.00106066	2.19476
EMP1	2.17883e-06	3.12172
ENHO	4.68307e-07	-4.03814
ENPP7P13	4.8555e-06	-4.37851
EPB41L4A	4.17697e-05	-2.31076
EPHA2	0.000242795	2.86429
EPHA4	2.62916e-06	-3.27203
ERCC6L	9.2333e-06	2.25665
ERO1A	0.000268033	2.32802
ERVK3-1	3.85786e-07	2.31133
ETS2	5.03094e-05	3.16686
ETV5	7.21716e-07	3.22441
EVI2A	9.1173e-07	3.53991
EVI2B	1.98078e-07	5.89515
EVX1	6.11644e-05	-3.24375
EXD3	9.12326e-06	-3.13536
EXOSC2	1.75297e-06	2.2273
F12	1.38773e-06	2.95514
F2R	4.38537e-07	3.21545
FAIM2	6.90143e-08	-4.35016
FAM107B	2.02149e-07	2.80407
FAM120C	9.8748e-06	-2.53971
FAM122C	0.000117256	-2.10675
FAM20C	0.000240869	2.30899
FAM216A	3.53986e-05	2.39364
FAM228B	6.10901e-07	-2.98901
FAM229A	0.00147975	-3.04197
FAM72B	2.68366e-05	2.90381
FAM72D	5.75731e-05	2.52096
FAM89A	5.03282e-05	2.92263
FAM91A1	8.08891e-06	2.55363
FAP	7.35055e-05	-3.55386
FARSB	5.22728e-05	2.13426
FAXDC2	1.70082e-06	-6.498
FBLL1	9.0817e-05	-2.18627
FBLN1	2.07721e-06	-2.5763
FBXL20	1.02003e-05	-2.15355
FBXO25	4.40687e-05	-2.05157
FBXO32	1.21979e-05	-2.08289
FBXW4	6.45202e-05	-2.32725
FCGR2C	0.00105023	-2.11073
FCGRT	4.66166e-06	-2.43787
FGD5-AS1	3.75556e-06	-4.92666
FIGN	2.3926e-05	-2.2052
FJX1	0.000104739	2.27996
FKBP4	0.000402704	2.07407
FLNB-AS1	0.00155647	-3.60405
FLVCR1	2.11004e-06	2.26309
FOSL1	1.92556e-05	4.02064
FOSL2	1.01314e-06	-2.10141
FOXD3-AS1	0.000782029	-3.29573
FOXK2	0.000307483	2.08406
FOXL1	9.97546e-07	2.82709
FOXN3-AS1	1.8341e-06	2.11599
FOXO1	8.25661e-05	-2.22223
FOXP4	0.0240813	-2.33073
FRMD6	3.06369e-06	3.42334
FRY	1.39404e-06	-2.58405
FRZB	0.000495543	-6.96313
FST	2.90695e-06	8.49346
FTHL17	0.000642712	-3.57627
FZD4	2.68829e-05	-2.30899
GAA	2.72411e-07	-2.87995
GABPB1	4.68175e-06	2.80615
GABRE	0.000527144	-2.16008
GADD45A	5.23866e-07	3.20184
GALNT12	3.03212e-05	2.43403
GALNT17	1.30388e-05	-5.22479
GALR3	0.0134722	-2.19865
GANC	2.89736e-06	-2.15316
GARS1	9.67219e-07	2.27045
GART	5.18844e-05	2.0465
GAS1	0.00168329	-2.39797
GAS5	3.72791e-05	2.10761
GASAL1	2.58614e-06	2.42075
GASK1B	9.36939e-06	-3.73741
GATA3	7.11322e-05	2.23072
GATAD2A	1.73384e-05	2.14958
GATM	5.447e-05	-2.60417
GBP2	0.000188197	-2.01285
GDF15	0.000617779	2.04447
GFAP	8.15703e-06	-10.0984
GFOD1	1.35379e-08	-2.17446
GGTLC1	0.000139252	-2.30584
GGTLC3	0.000236007	-2.25833
GJA1	2.20193e-05	3.37132
GJA3	1.4433e-05	-3.11465
GLB1L	1.81894e-05	-2.3317
GLDN	8.64066e-06	-28.9895
GLIS1	7.03349e-06	-2.8081
GLIS3	4.93548e-06	2.31
GLTPD2	2.92014e-05	-2.02319
GNAZ	1.94398e-05	-3.47644
GNG7	6.31535e-06	-5.43031
GNL3	1.23664e-05	2.26365
GNS	5.30237e-05	-2.04994
GPAT3	2.0631e-05	2.81161
GPATCH4	0.000231524	2.03951
GPC3	0.00320424	-2.09824
GPM6B	0.000156691	-3.52362
GPNMB	2.4576e-05	-3.38293
GPR107	2.08518e-06	3.69265
GPRC5B	3.9364e-06	-3.16105
GRAMD1A	3.73204e-05	2.06266
GRIN2A	5.75391e-07	-7.98572
GRK3	3.19399e-05	-2.29618
GSAP	0.000100626	-2.384
GSN	4.1448e-06	-2.14096
GSPT1	1.21997e-05	2.28866
GSTA4	1.99679e-05	-2.33656
H2BC12	1.91068e-05	2.02627
H3C1	4.60298e-05	-3.04187
H4C8	5.30541e-05	2.19511
HAS2-AS1	0.000242937	-2.12935
HASPIN	0.00119894	2.35307
HAUS6	5.31144e-06	3.45652
HBEGF	5.18785e-06	4.34893
HCN2	0.0129546	-2.51357
HDAC5	2.82798e-07	-3.63226
HDHD5-AS1	4.26691e-05	-3.28863
HEPH	7.37622e-06	-2.75324
HEXD	2.68853e-06	-2.17791
HIPK2	0.00266174	-2.66248
HKDC1	6.11228e-05	2.42983
HLA-C	0.000162049	-3.00777
HMGA1	1.57512e-05	3.45405
HMGA2	3.4945e-06	6.48699
HMOX1	8.02666e-07	2.68075
HNRNPH3	6.18394e-05	2.21166
HOMER2	1.24504e-05	2.1271
HOMER3	0.000153782	2.4518
HOPX	0.000121613	2.42655
HOXB9	2.18668e-06	3.76487
HOXD3	0.000103182	-2.3822
HRK	5.26668e-05	3.51619
HROB	0.000521478	2.00663
HS6ST1	0.000165676	-2.10645
HSD17B14	4.55302e-06	-2.16035
HSPG2	7.33078e-05	-4.09418
HTR7	5.47929e-06	2.67719
ICOSLG	3.91851e-06	2.16779
ID2	1.11993e-06	-3.26195
ID4	0.000149512	-2.10672
IDH1-AS1	4.08694e-06	-2.07684
IDO1	0.000194199	2.55094
IDUA	1.06022e-05	-2.19541
IER3	1.75463e-07	10.9789
IER5L	2.22499e-06	-2.80735
IFIT2	0.000309197	-2.65338
IFITM2	8.36195e-06	-2.30459
IFITM4P	7.713e-05	-2.05064
IFRD1	1.66712e-05	2.48301
IFRD2	5.43875e-06	2.0035
IFT140	1.48409e-06	-2.53681
IGFBP3	5.1138e-05	4.8426
IGFBP5	0.000235083	-2.14067
IKBIP	1.84234e-05	2.12345
IL11	2.92751e-07	7.34932
IL17RC	3.59209e-05	-2.11986
IL18	1.45053e-05	2.05674
IL20RB	0.000327339	2.05935
IL32	0.00123951	2.46735
IL4R	0.00012722	2.22997
IL7R	4.33679e-05	2.85572
IMP4	3.33673e-06	2.00137
INF2	1.04088e-05	2.01032
ING1	5.60473e-06	2.38784
INHBA	0.00621647	2.01615
INIP	8.13128e-06	2.0783
INPP5F	7.97531e-05	2.09831
INSIG2	0.00052534	2.06034
INTS6-AS1	0.000266078	-2.19073
IQCK	5.47638e-05	-2.13014
ISCA1	0.000171789	2.0139
ITGA9	3.83953e-05	-2.63152
ITGB4	2.16794e-07	-3.74671
ITM2B	0.000386864	-6.61938
JAG1	3.69371e-06	4.23556
JDP2	1.13725e-05	3.99623
JMJD6	2.42649e-06	2.70154
JMY	2.69954e-05	-2.07469
JPH2	0.000503343	2.16662
JPH3	0.000125359	-3.71248
KALRN	8.47114e-05	-2.3112
KANK1	1.72805e-05	3.14923
KBTBD13	0.000236705	-2.02801
KCNE5	4.07532e-06	5.172
KCNIP4	1.83614e-05	-2.20885
KCNJ2	2.37768e-05	2.25271
KCNN4	5.52292e-06	2.61827
KCNQ5-IT1	9.69131e-05	3.78823
KCP	1.23776e-06	-2.50247
KCTD12	1.16648e-05	-2.43376
KDM7A	9.46313e-07	-5.71068
KDM7A-DT	5.79446e-07	-4.34078
KDR	1.27064e-06	3.27852
KDSR	6.0405e-06	2.23681
KHDRBS3	2.59739e-06	2.29258
KIAA0408	2.1677e-06	2.19636
KIAA0513	1.30559e-05	-2.25538
KIF16B	3.89307e-06	2.06796
KIF18A	0.000398969	2.05242
KIF23	0.000254849	2.46739
KIF6	0.000574494	-2.08461
KIFAP3	2.71245e-06	-2.07925
KLF10	3.25676e-05	2.45121
KLF3	9.8333e-06	-2.00768
KLF6	5.17248e-06	2.39392
KLF7	2.3113e-05	2.34244
KLHDC9	7.30193e-07	-3.20394
KLHL22	0.000469961	-2.11684
KLHL24	8.48924e-07	-2.91822
KLHL3	2.16081e-05	-2.78395
KLRG2	0.00737771	-2.8734
KMT5A	5.95068e-07	2.71891
KMT5B	6.35789e-06	2.52348
KRT32	1.64585e-08	-6.00655
KRT80	1.43086e-06	3.14707
KRT83	0.00022404	3.41191
KRT8P12	1.84643e-07	2.054
KRTAP1-1	0.000545273	-2.04166
KRTAP1-4	0.000397218	-2.19622
KRTAP4-11	0.00292559	-3.00013
LAMB2	0.000109193	-2.40611
LAMC2	2.13585e-05	3.35413
LAMP2	8.6423e-05	-2.00034
LARGE1	4.15852e-06	-2.58654
LBX1	0.00624821	-2.01713
LCP1	3.0753e-05	3.33939
LDLRAD4	1.39543e-06	-8.18092
LHPP	1.74203e-05	-2.98722
LHX1	0.000175644	2.38595
LHX1-DT	1.33953e-05	2.95173
LIF	1.62291e-05	5.27529
LIMA1	2.27233e-05	2.09065
LINC00461	8.13915e-06	-2.65847
LINC00475	4.64302e-07	-4.50802
LINC00520	4.71106e-05	12.2625
LINC00632	5.89483e-05	2.62963
LINC00662	0.00217134	2.00286
LINC00674	5.98312e-05	-2.13892
LINC00707	1.17994e-06	6.35586
LINC00847	4.61268e-06	-2.16247
LINC00930	4.13422e-07	-4.89719
LINC00941	1.45367e-06	4.04624
LINC00967	4.09853e-05	-3.4614
LINC01023	1.07033e-06	-2.22424
LINC01258	0.000467434	-2.58934
LINC01291	9.35444e-06	3.35868
LINC01444	2.69508e-05	2.64584
LINC01535	0.00136343	-2.68396
LINC02035	2.33618e-05	-2.38038
LINC02085	4.50794e-07	8.35158
LINC02104	1.21273e-07	2.54692
LINC02154	1.04582e-05	4.805
LINC02593	2.02996e-05	-3.54133
LINC02595	7.19288e-05	2.66294
LINP1	5.27757e-05	2.00154
LLGL2	4.28868e-06	-2.24572
LMBR1	2.71612e-05	-2.3535
LMCD1	5.68918e-07	-6.53861
LMNTD2-AS1	8.40797e-05	-2.24586
LMO3	1.15323e-05	-2.26235
LMO7	6.39518e-05	2.28805
lnc-CCDC68-1	5.74023e-06	2.20421
lnc-CYP7B1-3	0.00186241	-2.42761
lnc-HDAC2-1	8.58276e-05	2.16028
lnc-MYC-2	0.00291682	2.15681
lnc-PKNOX1-2	1.55586e-06	-2.01788
lnc-PPP2R2D-3	1.61751e-07	-4.42757
lnc-RP11-158I9.5.1-2	3.65482e-07	-2.48096
lnc-RP11-597K23.2.1-2	7.88808e-06	2.81316
lnc-SH3BP4-3	1.86985e-05	2.08305
lnc-VWF-2	0.00481811	-2.13281
lnc-WDR63-1	4.97663e-06	-2.77008
LOC100505938	0.00494339	-2.5685
LOC100507291	2.46146e-05	-3.36355
LOC100507516	1.57083e-06	-3.47979
LOC101927100	1.80433e-05	-2.60497
LOC101927318	3.06227e-06	-4.36272
LOC101928370	3.43776e-05	3.87821
LOC101928402	4.15156e-05	-2.18695
LOC105374347	0.000515815	-2.00903
LOC105377123	1.1434e-05	2.49441
LOC107984208	0.0130946	-2.38466
LOC107987300	0.000282014	-2.14955
LOC153684	2.53161e-05	-2.22196
LOC254896	0.00015812	-2.32023
LOC401127	4.28505e-06	3.05008
LOC646652	3.8867e-05	-2.78925
LOC728392	3.48582e-06	-3.15445
LOX	0.000331874	2.85351
LOXL4	5.68154e-05	-2.05364
LPCAT2	8.91394e-06	3.94024
LPIN1	0.000110433	-2.1215
LPL	2.69436e-06	3.04443
LPXN	1.31729e-05	3.31008
LRP1B	2.49353e-06	-4.16812
LRRC2	0.000147248	2.10633
LRRC24	2.44437e-06	-2.31914
LRRC56	1.57038e-05	-2.89594
LRRC73	4.1527e-05	-2.1989
LRRC8B	0.000380471	-2.16012
LRRFIP1	8.48624e-05	2.36219
LRRFIP2	0.000353544	2.14383
LSAMP	0.000148681	-2.39043
LSMEM1	1.57811e-05	2.30484
LTBP3	0.000220105	-2.36068
LYAR	8.25105e-06	2.87624
LYNX1	9.1529e-09	-2.02704
LYPD1	0.000144557	-3.94094
LYPLAL1	3.62077e-05	-2.2702
LYRM9	7.41108e-07	-3.20207
LZTS1	4.30652e-06	-2.72674
MAD2L1	0.000723805	2.03576
MAFF	1.4864e-06	3.07855
MAL	2.99819e-07	-3.60206
MAN1A1	0.00021216	2.2453
MAN1C1	1.21151e-05	-4.45665
MANCR	2.86019e-08	4.73209
MAP2K3	9.52377e-06	2.06222
MAP6	2.35383e-05	-2.96212
MAPKAP1	8.30505e-05	2.13136
MAPT	1.56845e-06	-3.73672
MBOAT7	3.43891e-06	2.34563
ME2	0.000523062	2.12317
MEG3	0.000865549	2.13263
MEGF8	4.17708e-06	-2.86116
MELTF-AS1	1.52337e-05	-2.26818
METRN	1.01247e-05	-2.58191
METTL1	1.32468e-05	2.23331
METTL7A	0.000166706	-2.38885
MGLL	9.26727e-07	4.86295
MICB	2.90438e-05	2.14942
MINAR1	0.000345785	-2.04957
MINDY1	6.82487e-08	-2.51732
MIR4435-2HG	1.99114e-05	2.47328
MIR99AHG	7.63377e-05	-2.82423
MLC1	1.02138e-06	-4.31549
MLKL	1.35697e-06	2.18322
MMP25-AS1	0.00343879	-2.08099
MMP3	1.69503e-05	9.80372
MMS22L	0.000316609	2.15628
MON1B	0.00525279	-2.01501
MOSMO	6.94559e-06	2.06422
MOSPD1	2.3601e-05	2.42199
MPDZ	8.8273e-05	-2.4625
MPP3	1.48013e-06	2.13856
MPP4	2.79723e-07	8.93475
MRAP2	2.21855e-06	3.1645
MROH1	1.72155e-05	2.45368
MRPL19	8.08167e-05	2.19538
MSANTD3	1.15134e-07	3.20255
MSL3	4.39664e-05	2.03568
MSMO1	0.000147041	2.60969
MSMP	0.000145777	2.83205
MST1	5.72354e-05	-2.16237
MT1F	1.48099e-05	-2.23279
MT1M	0.000241591	-4.39155
MTHFD1L	1.38783e-05	2.34516
MTHFD2	4.61805e-06	2.66769
MTMR10	1.48899e-05	-3.47774
MTRNR2L2	0.00160548	-2.18242
MTRNR2L7	6.17817e-05	-4.65336
MTURN	9.07593e-06	-2.16765
MXD4	3.09017e-05	-2.50319
MYBL1	2.10787e-05	2.35959
MYC	4.8527e-06	3.95949
MYLK	1.06489e-05	-4.43884
MYLK2	3.59992e-05	2.23962
MYO19	1.58433e-05	2.78719
NAA50	7.15894e-07	2.23184
NAGLU	1.05801e-05	-2.19195
NALCN	2.62333e-07	-2.56541
NAT8L	1.2972e-05	-2.61703
NAV3	7.91396e-05	4.6005
NCAPH2	1.37183e-06	2.46077
NDUFC2	0.00210887	-2.05909
NDUFV3	9.68556e-05	-2.20842
NECTIN3	2.05601e-06	3.02714
NEDD4	0.000275092	2.50527
NEDD9	2.19123e-08	2.35128
NEURL1B	2.2597e-05	-3.39905
NEURL3	0.00021361	2.12051
NEXN	0.000602533	2.14548
NFASC	0.000240558	-2.01576
NFATC1	0.000132103	-2.15856
NIBAN1	6.8865e-06	-2.05421
NKAIN3	4.16871e-06	-4.81991
NKX3-1	7.44127e-06	3.05418
NMNAT2	6.09518e-05	-2.24706
NMNAT3	4.34412e-07	-4.62939
NOP16	4.19729e-05	2.07214
NOP2	3.99348e-06	2.26969
NOP56	0.000314551	2.19452
NOVA2	2.10209e-05	-2.17184
NOXA1	2.80819e-05	-2.86967
NPM3	0.000163233	2.05088
NPY1R	0.000129718	-3.7341
NR2F1	6.58663e-06	-2.04117
NRAS	4.26812e-05	2.20365
NRG1	6.6081e-07	4.94659
NT5C3A	2.39677e-06	2.33864
NT5E	9.63748e-09	8.85808
NTM	3.73448e-05	4.30413
NTNG1	7.06407e-05	-3.66514
NUCB1	0.000437023	-2.00433
NUDT15	1.56675e-05	2.73393
NUDT4	1.1564e-05	-3.07742
NUF2	0.000621169	2.12085
NUP50	7.36205e-06	2.42185
NUP58	5.43209e-05	2.10299
ODF3B	2.96076e-05	-3.98712
ODF3L2	0.00266891	-2.02254
OLFML2A	1.78091e-05	-2.10622
OLFML2B	5.16331e-05	-2.94829
OPLAH	1.83674e-05	-2.02788
OR7E14P	1.20225e-05	-2.33056
ORC6	6.39947e-06	2.80874
OSBPL3	2.57313e-05	2.22223
OTUD7A	4.37453e-06	3.75913
OXSR1	4.64325e-05	2.0036
PAM16	1.97403e-05	2.20343
PAPPA	9.34437e-06	3.7323
PARP14	0.000121378	-2.45952
PARP8	4.21624e-05	2.18858
PARP9	0.00416686	-2.00319
PBX1	3.41174e-06	-4.0781
PBXIP1	0.000153708	-2.21569
PC	7.77839e-08	-2.26388
PCCA-DT	7.15008e-06	2.07403
PCDH1	1.47908e-07	4.29266
PCDH20	0.000118415	-3.17691
PCDHB16	7.57509e-06	-2.32768
PCDHB9	2.76794e-07	-2.36065
PCMT1	9.85673e-07	2.08525
PCMTD2	7.43317e-06	-3.27724
PDE4DIP	0.00010556	-2.00341
PDE5A	2.43889e-06	-6.05522
PDGFRA	5.11499e-06	-6.16096
PDIA5	0.000145199	-2.23838
PDK2	5.14525e-06	-2.58276
PDLIM3	2.29891e-05	-2.40708
PDLIM5	2.84591e-06	2.41155
PDSS1	3.25834e-05	2.60577
PGAM5	4.7966e-06	2.31463
PGF	5.40619e-08	5.21878
PGGHG	0.00026221	-2.15843
PGM2L1	2.17463e-05	-2.18475
PGM5P3-AS1	2.05054e-05	-2.25061
PHF21A	0.00017799	-2.15982
PHLDA2	1.94975e-06	3.95009
PI15	0.000491903	-2.8655
PIANP	0.000618931	-2.20277
PIEZO1	4.45881e-05	-3.64724
PIGZ	1.43194e-06	-3.16779
PIK3CD-AS2	1.13074e-06	-2.58032
PINLYP	4.7916e-07	3.71247
PIPOX	0.00018898	-2.42692
PLA2G6	2.92892e-05	-2.12548
PLAAT4	3.38983e-06	-3.92002
PLAUR	1.21771e-07	4.98011
PLCD3	0.000150735	-2.84912
PLCD4	4.96221e-07	-2.58916
PLEKHA7	1.89883e-05	-6.85592
PLEKHB1	3.62365e-06	-3.22997
PLK1	2.92268e-05	3.25993
PLK4	0.000169853	2.25739
PLPP4	0.000167786	2.12292
PLPP7	9.19795e-06	-3.63162
PLS1	4.75416e-05	2.40261
PLSCR4	0.00191483	-2.34717
PLXNA2	1.07733e-05	-11.9357
PMAIP1	3.94354e-06	3.03394
PMM2	4.59735e-06	2.16598
PNLIPRP3	1.38055e-06	18.2895
PNO1	2.50739e-06	2.27049
PNP	1.20325e-06	2.39601
PNPLA7	5.14814e-06	-4.61295
PNRC1	5.40616e-05	-2.46082
POLQ	2.37202e-06	2.54661
POLR1E	0.000134495	2.47523
POLR2D	2.1738e-06	2.08256
POLR3G	2.93914e-06	2.79528
PPA1	3.83706e-05	2.00551
PPA2	0.00223328	-2.9518
PPAT	8.11512e-06	2.09213
PPDPF	0.0043966	-2.10133
PPIAL4A	0.0206894	-2.46235
PPM1M	0.000754292	-2.0284
PPP1CB	1.47405e-05	-2.75167
PPP1R14B-AS1	3.53208e-05	2.17115
PPP1R16B	3.09867e-07	-2.95601
PPP4R2	8.42337e-05	2.03688
PRDM8	1.49938e-05	4.26468
PRKAG2	9.27511e-05	2.51273
PRKCQ-AS1	3.77117e-06	2.95489
PRKD1	1.66231e-05	-2.45091
PROS1	1.84011e-06	-4.41311
PRPF3	7.83979e-07	2.08534
PRPS1	6.96641e-08	2.18377
PRR36	0.00751542	-2.9253
PRRT2	0.000100325	-2.81115
PRRT3	5.95307e-07	-2.93972
PRRT3-AS1	0.0177369	-3.75227
PRUNE2	7.77533e-06	-2.87744
PSAT1	8.43305e-06	2.1193
PSD4	0.000104623	-2.62249
PSG4	0.000190327	2.25434
PSMC3IP	8.55141e-05	2.27353
PSMG3-AS1	2.80682e-05	-2.17637
PTBP3	6.69255e-05	2.2774
PTCRA	4.73963e-06	-3.50758
PTGFR	0.000117256	-3.19729
PTHLH	6.43629e-06	3.8943
PTP4A1	6.4633e-06	2.49323
PTPRB	5.95919e-05	-3.04876
PTPRD	4.19346e-07	-3.99975
PTPRK	4.4876e-07	2.25783
PTPRS	7.80426e-07	-2.51113
PTPRZ1	0.000522477	-2.705
PTX3	3.94644e-07	3.02854
PUS1	4.74298e-06	2.06448
PVT1	1.46111e-07	3.71871
PXMP4	1.41446e-06	-2.45358
PYGO1	1.76079e-06	-2.57487
PYROXD2	7.24781e-06	-2.20958
PYY2	0.000726007	-2.69817
RAB11FIP4	3.9244e-08	-4.79675
RAB26	2.95916e-06	-4.53888
RAB27B	5.11194e-05	2.4884
RAB3B	6.5354e-06	3.06306
RAB9B	7.06895e-05	-2.1011
RABGGTB	1.97671e-05	2.14416
RAC2	0.00026149	2.53719
RAD51	7.06879e-05	2.03873
RAD51AP1	0.00129173	2.78627
RALGPS1	3.5042e-07	-2.68423
RAMP1	0.000252693	-2.84889
RAN	5.75419e-06	2.04772
RAP1GDS1	8.10713e-06	2.27632
RAP2C	4.97953e-05	2.17901
RASA1	3.29378e-05	2.46802
RASA4	9.53541e-06	-2.2428
RASAL2	6.27708e-05	2.11156
RASGRP1	8.19297e-06	-4.17414
RBFOX3	8.9785e-05	-2.97799
RBM43	5.39844e-05	-2.81569
RBPMS-AS1	2.07085e-05	-2.1716
RCAN2	1.55971e-05	-2.58147
RCL1	2.29426e-08	3.05874
RECQL5	7.29365e-07	3.16949
REEP4	4.43484e-05	2.15685
RFC3	0.000221303	2.24596
RFWD3	7.26735e-05	2.0054
RGL1	0.000151394	-2.07128
RGMB	5.88367e-06	3.07945
RGS4	7.39022e-06	2.82158
RGS7	0.000154268	2.31537
RHBDL1	0.00201549	-2.05522
RHOQ	7.36628e-05	-2.79501
RHOU	4.19716e-05	-3.09081
RHPN1	4.17773e-05	-2.36011
RIMKLA	0.00820203	2.1931
RIOK1	0.000139645	2.13571
RIPK2	5.58025e-08	3.21355
RND2	2.76352e-07	-4.03148
RND3	1.19329e-05	3.19287
RNF112	4.21162e-05	-3.05399
RNF141	6.46693e-07	-2.40644
RNF150	1.07651e-05	-2.62032
RNF165	0.0102967	-2.33492
RNF2	0.000634022	2.15084
RNF217	4.7477e-07	2.19367
ROPN1	6.27153e-05	-2.07882
RORA	0.00409058	2.3359
RP9P	4.56772e-06	2.28982
RPF2	2.1365e-06	2.11228
RPL32	0.00169225	2.44969
RPL7	0.00339139	-2.32087
RPRM	8.42777e-05	-2.60889
RPS29	6.00974e-06	-3.6664
RPS6KA3	1.35974e-05	2.0087
RRN3	0.00232501	2.0599
RRS1	0.000118513	2.00542
RTL3	1.55046e-06	4.1615
RTP4	0.000120802	-2.13462
RUNX1	1.70666e-05	3.39052
S100A2	7.82078e-05	2.20566
S100A3	1.93315e-06	2.09311
S100B	0.000133632	-3.90023
S1PR1	1.21483e-05	4.32229
S1PR3	0.000371917	2.02089
SALL2	5.2948e-06	-2.88303
SAMD5	5.36048e-06	-3.2194
SAPCD2	1.99647e-05	2.44438
SATB1	9.52816e-07	-3.30686
SCARNA20	0.0170437	2.07035
SCN4B	2.64882e-07	-5.3528
SCRG1	0.00051139	-2.84776
SDC3	4.69767e-05	-2.04914
SEC31B	7.07786e-05	-2.18526
SEH1L	3.68761e-05	2.52215
SELENBP1	2.29534e-07	-3.56642
SELENOP	1.53918e-05	-9.36184
SEMA3B	1.00603e-06	-3.00393
SEMA5A	1.07427e-06	-2.62734
SEMA5B	1.3427e-05	-7.5954
SEMA6C	1.2985e-05	-2.21814
SEMA7A	1.28203e-05	2.85358
SEPTIN9	7.26593e-05	-2.08216
SERINC5	8.26797e-06	-2.66857
SERPINA3	0.00170936	-2.4949
SERPINB7	6.69075e-05	6.92869
SERPINE1	1.79308e-06	6.61959
SESN2	8.24151e-05	2.40907
SESN3	9.87149e-06	-3.24873
SETMAR	1.54856e-05	-2.14621
SFRP1	0.000296243	-2.31568
SFTA1P	0.00477271	-2.46631
SGO1	2.9533e-05	2.50602
SH2B3	2.25449e-06	2.98625
SH3RF1	1.78858e-05	2.22044
SH3YL1	3.04587e-05	-2.13313
SHC2	6.14946e-06	-3.56204
SHC4	3.42489e-08	6.20959
SHCBP1	5.03856e-05	2.13348
SHISA5	0.000123863	-2.41054
SIAE	3.96648e-05	-2.19184
SIDT2	1.17161e-05	-2.38293
SIK1B	2.08078e-06	3.09866
SIRPA	3.43155e-06	-3.23752
SKA1	4.71289e-05	2.20521
SLC16A4	1.58513e-05	-2.40802
SLC16A9	0.000164591	-2.09873
SLC1A5	0.000125397	2.31393
SLC22A17	0.000109664	-2.18963
SLC25A19	6.18752e-06	2.07438
SLC25A3P1	5.08451e-05	-2.38951
SLC27A1	2.8419e-06	-3.42267
SLC27A6	7.90964e-05	-3.43825
SLC2A10	2.61546e-05	-2.45448
SLC35E2A	6.66704e-05	-2.5179
SLC35E2B	8.24814e-06	-2.46958
SLC35F1	0.000962621	-2.68952
SLC35F2	1.89874e-06	2.7949
SLC37A2	0.000375957	3.15428
SLC38A1	2.07221e-07	2.70662
SLC38A3	9.30474e-07	-6.81887
SLC39A8	7.91935e-05	2.14499
SLC3A2	0.000307279	2.05956
SLC40A1	5.4859e-05	-3.30742
SLC43A3	3.46345e-05	2.78901
SLC6A6	0.000165887	-3.00355
SLC6A9	1.34314e-05	2.53071
SLC7A1	0.000129072	2.59067
SLC7A5	0.000225167	3.12686
SLC8A1	0.00011024	2.0241
SLCO4A1	1.79454e-06	4.67305
SMAD7	6.1489e-05	2.58467
SMARCA2	0.000208632	-2.09585
SMARCD3	1.71942e-06	-2.7735
SMIM10L2A	2.51573e-05	-2.80008
SMIM10L2B	1.86492e-06	-2.44663
SMIM35	0.00446688	-2.32632
SMNDC1	0.00115434	2.02088
SMOX	1.88586e-05	2.28866
SNAP47	0.00194691	-2.12235
SNHG1	7.93226e-08	4.71997
SNHG15	9.65641e-07	2.69051
SNHG17	6.53368e-07	2.1731
SNHG18	1.44719e-05	-2.29391
SNHG5	4.03812e-06	2.34331
SNHG6	0.00519246	-2.08024
SNHG7	9.84353e-06	2.8545
SNORA18	7.03982e-06	2.04764
SNORA24	3.56826e-05	2.03602
SNORA40B	2.90022e-07	2.01684
SNORA48	0.000311203	3.40902
SNORA57	0.000739164	2.16315
SNORA5A	0.00134797	2.10022
SNORA5B	0.000537379	2.226
SNORA6	0.00327231	2.21725
SNORA62	0.000828759	3.60551
SNORA63	0.00250788	2.01451
SNORA65	0.00109738	2.29506
SNORA67	0.0048471	2.68001
SNORA80A	5.7005e-05	3.81537
SNORA80B	0.000689347	2.59982
SNORA84	2.08275e-05	2.77641
SNORA9	0.000627412	3.41596
SNORD11	0.000303431	2.69639
SNORD27	0.00121723	2.75104
SNORD43	2.77688e-07	2.03936
SNORD46	4.97823e-05	4.96179
SNORD71	7.87516e-06	3.55325
SNORD86	5.38887e-05	2.99951
SNORD95	4.04134e-05	2.30094
SNRNP40	0.00142434	2.05391
SNRNP48	6.4886e-05	2.01973
SNRPB	6.20825e-07	2.07232
SNX1	9.64015e-07	-2.18351
SNX25	7.93372e-05	2.29065
SOBP	3.76537e-06	-2.70605
SORL1	2.95337e-05	-2.25993
SOX2-OT	3.34227e-05	-3.31794
SOX4	7.31878e-06	-2.07228
SOX9-AS1	5.73502e-07	-3.17791
SPAAR	0.0011203	-2.05564
SPACA6	1.46862e-05	-2.14378
SPANXA1	1.00084e-06	5.01474
SPANXB1	2.6227e-07	7.87571
SPARC	4.80517e-05	-2.6833
SPDL1	0.00022311	2.47248
SPHK1	4.35447e-05	4.50116
SPINDOC	5.91597e-06	2.36526
SPINK1	1.80308e-06	14.6625
SPOCD1	1.96185e-06	2.22058
SPON2	5.93623e-06	-4.06147
SPRED2	4.41514e-05	2.12399
SPRY1	0.000256298	2.61016
SPRY2	2.15135e-06	2.35673
SPRY4	4.44987e-06	4.76271
SPRY4-IT1	0.000233383	3.52934
SPSB2	1.88259e-05	-2.47069
SSH1	1.12788e-05	3.21373
SSH2	2.32447e-05	2.41892
SSPN	5.21315e-05	-2.34139
ST3GAL6-AS1	6.98499e-06	3.49868
ST6GALNAC2	8.09446e-07	-7.84124
ST7-AS1	2.01351e-05	-2.65126
STAMBPL1	0.000280202	2.02583
STAT2	4.85609e-05	-2.80352
STC1	0.00020908	2.51297
STEAP1	6.27998e-05	2.56965
STEAP1B	5.59628e-05	2.00709
STING1	8.0102e-06	-3.05644
STON1	1.9597e-06	-4.93919
STOX2	9.92324e-07	-2.72824
STPG1	1.24396e-05	2.07258
STRA6	5.51652e-05	-2.53698
STRIP2	5.11555e-06	2.80541
STX1A	2.39998e-05	2.55365
SULF1	0.000395094	-2.88257
SULF2	0.00762611	-2.07196
SUMO2	0.0028663	-2.69423
SUV39H2	3.8425e-05	2.04819
SYNE2	0.000838683	-2.16585
SYNM	8.17916e-05	-2.5301
SYNPO	7.70884e-06	-2.37445
SYT11	1.44275e-05	-2.01824
SYT12	1.05896e-05	-2.78984
SYTL2	0.000528582	2.23351
TAF1D	0.000587277	2.24719
TBCD	9.38986e-05	-2.1551
TBRG1	5.69366e-06	2.41209
TBX2-AS1	1.04194e-05	-2.11623
TBX3	0.000157804	2.4019
TCEAL5	0.000126212	-2.12331
TCEANC	9.32831e-05	-2.10137
TCN2	0.000111925	-2.46394
TCOF1	7.09184e-06	2.03439
TEDC1	0.000217813	2.05925
TENT5C	0.000444957	-2.14125
TEX30	0.000348499	2.01149
TFEB	0.00024254	4.63681
TGM2	5.40964e-06	5.63617
THBS2	1.25638e-05	-2.8462
THBS3	0.000152914	-2.79663
THNSL2	6.45127e-05	-2.68202
THRA	4.4406e-05	-2.76745
THSD1	4.06168e-06	2.32825
TICRR	8.88299e-06	2.38215
TLE1	3.39283e-05	2.10427
TLR4	4.60322e-08	2.83896
TM4SF1	5.86917e-06	2.90341
TM4SF19	1.61649e-06	5.49845
TM7SF2	1.26546e-05	-2.93873
TMBIM4	8.71703e-06	-2.4446
TMEM129	3.64975e-05	-2.84551
TMEM158	1.23338e-06	6.9499
TMEM161B-AS1	6.16978e-07	-2.11708
TMEM200C	0.00392332	-2.9618
TMEM229B	1.83775e-05	-3.78513
TMEM244	5.99027e-06	2.708
TMEM26	7.68158e-05	-3.5352
TMEM47	0.00215986	2.05996
TMEM59L	1.62903e-05	-2.06977
TMEM63C	2.06147e-05	-3.1723
TMEM79	7.35935e-05	2.3599
TMEM87B	0.000168666	2.43323
TMEM8B	5.54318e-06	-3.30062
TMEM95	0.0112218	-2.26104
TMPO	0.00292434	2.61303
TMPRSS5	1.42332e-06	-3.53627
TMTC4	2.75373e-05	-2.72513
TNC	0.000464181	2.66599
TNFAIP3	3.10401e-05	3.21457
TNFRSF12A	1.39745e-05	2.02505
TNFRSF14	4.55435e-08	-2.43075
TNFSF4	0.000174649	2.53823
TNRC18P1	0.000167027	-2.88167
TNS2	6.03272e-05	-2.17776
TOMM40	0.000609038	2.3326
TOR4A	2.14443e-05	2.03862
TOX	3.04478e-05	-2.69182
TPD52L1	7.00408e-05	-2.28658
TPM3	1.55764e-06	2.08888
TPP1	6.16849e-07	-2.33714
TPT1	0.00674669	-2.28827
TPX2	1.96907e-05	2.09101
TRAF3IP2-AS1	0.000421493	-2.14618
TRAPPC10	1.2675e-05	2.85521
TRAPPC6A	1.84618e-06	-2.09525
TRIB2	9.25931e-07	2.7264
TRIB3	1.08957e-05	2.47466
TRIM11	1.79772e-05	2.52017
TRIM45	1.8224e-06	-2.87368
TRIM7	8.43615e-06	2.40157
TRIP13	3.49652e-05	3.35704
TRMT6	6.01006e-06	2.16344
TRPC6	0.000129668	-2.57516
TRPM3	1.789e-07	-5.13447
TSPAN13	6.69515e-06	3.26194
TSPAN5	1.38498e-06	2.65485
TTC39A	7.29031e-06	-3.43295
TTK	3.63103e-05	2.34275
TTLL1	3.27312e-06	-2.51599
TTYH1	0.000128108	-3.1238
TUBB2B	9.13988e-06	-2.56409
TUSC1	0.000105723	-2.31786
TWIST2	1.14858e-06	-2.94469
TWNK	2.93539e-05	2.22853
TXNIP	0.00105001	-2.89696
UAP1	2.64123e-07	3.55216
UBA7	0.000162335	-2.33848
UBE2E3	2.13292e-06	4.13704
UCK2	5.8845e-06	2.8067
UCN2	1.91627e-06	6.66191
UCP3	4.61936e-05	-2.09684
UHRF2	1.09469e-05	2.11482
UNK	6.20947e-05	-2.23455
UPP1	1.69314e-05	3.44409
USB1	7.57193e-06	2.26109
USP31	9.71113e-06	3.10308
USP53	1.15856e-05	2.23808
UTS2R	0.00874072	-3.02457
VBP1	0.000412743	2.05408
VDAC1	0.000112947	2.06325
VDR	1.2459e-05	3.69013
VEGFC	9.03326e-08	3.67614
VEPH1	6.03715e-07	3.37219
VGF	1.00511e-05	4.00852
VIT	1.49465e-05	-6.30555
VLDLR	2.33235e-05	-2.94948
VLDLR-AS1	8.72673e-08	-3.71315
VMAC	1.04748e-07	-2.12077
VPS35L	7.85828e-06	-2.73044
VSTM2L	7.8217e-07	-4.47735
VSX1	0.000198205	-2.05034
WBP1L	3.64857e-06	-3.14796
WDR19	6.36322e-06	-2.2809
WNT5B	8.70087e-06	3.64031
WWTR1	8.98209e-06	2.14942
XDH	6.41725e-06	9.62664
XKR4	1.14692e-07	-10.6168
XLOC_l2_007656	8.35096e-06	-4.05901
XPOT	0.00127086	2.6846
YPEL3	6.11876e-06	-2.5194
YRDC	3.99041e-06	2.12777
ZBED5-AS1	2.28819e-06	-3.14368
ZBTB20	0.000517308	-2.96538
ZBTB24	5.98362e-06	3.02682
ZIK1	1.58903e-05	2.0319
ZNF365	4.804e-05	2.5572
ZNF436	1.20544e-06	-2.19202
ZNF436-AS1	1.16853e-06	-2.02729
ZNF44	1.65354e-06	2.45453
ZNF467	0.0014056	-2.33826
ZNF497	5.52544e-05	-2.35195
ZNF503	1.0546e-05	-2.79488
ZNF503-AS2	2.1559e-06	-3.19088
ZNF577	6.18532e-05	-2.38872
ZNF598	2.37939e-05	2.07284
ZNF618	0.000117102	-2.00953
ZNF697	2.89697e-05	2.21279
ZNF710-AS1	2.95838e-06	-2.27568
ZNF837	5.09016e-06	-2.26426
ZNF862	5.74809e-08	-2.79001
ZPR1	1.03238e-06	2.06573
ZWILCH	2.92829e-05	2.16767
ZWINT	5.92113e-05	2.00334
