# Supplementary material for: Molecular Characterization of the Dual Effect of the GPER Agonist G-1 in Glioblastoma
Source: Int J Mol Sci. 2022 Nov 18;23(22):14309. doi: 10.3390/ijms232214309 (PMC9695951; doi:10.3390/ijms232214309)
Supplement: Supplementary file 1 [file ijms-23-14309-s001.zip › Table_S8.xlsx]

## Sheet: table S8
Anonymity number	Gender	Age	Weight (kg)	Histology	IDH mutation
BC0921	F	67	50.4	GBM	wt
BE0921	F	68	83.0	GBM	wt
CD1121	M	57	77.0	GBM	wt
EP0921	F	72	52.7	GBM	wt
PS1221	F	71	67.5	GBM	wt
WM1021	F	71	65.0	GBM	wt
