# Supplementary material for: Molecular Characterization of the Dual Effect of the GPER Agonist G-1 in Glioblastoma
Source: Int J Mol Sci. 2022 Nov 18;23(22):14309. doi: 10.3390/ijms232214309 (PMC9695951; doi:10.3390/ijms232214309)
Supplement: Supplementary file 1 [file ijms-23-14309-s001.zip › Table_S9_revised.xlsx]

## Sheet: Supplementary_Table_S9_revised
Gene Symbol	Forward primer	Reverse primer
ANGPTL4	GACCAAGGGGCATGGAGCTT	CAGGGGACCTACACACAACAG
AURKA	GCAACCAGTGTACCTCATCCTG	AAGTCTTCCAAAGCCCACTGCC
BORA	CCTTCGCCTATTTCTTCACCCAC	CCAGATGAAGCATCAGGAGAATG
CDC20	TCGCATCTGGAATGTGTGCT	CCCGGGATGTGTGACCTTTG
FASN	ATGAGCACCAACGACACGAT	CTATAGGCCGCAGCCTTCTC
LDLR	GAATCTACTGGTCTGACCTGTCC	GGTCCAGTAGATGTTGCTGTGG
PLK1	GCAGCGTGCAGATCAACTTC	AGGAGACTCAGGCGGTATGT
SREBF1	ACTTCTGGAGGCATCGCAAGCA	AGGTTTCCAGAGGAGGCTACAAG
STARD4	CGTTACACTACTGCTGGTCAGC	GGTCTCTTTTCATCCCAGTCAAG
U6	CGGGTTTGTTTTGCATTTCT	AGTCCCAGCATGAACAGCTT
